# Supplementary material for: The Human Mixed Lineage Leukemia 5 (MLL5), a Sequentially and Structurally Divergent SET Domain-Containing Protein with No Intrinsic Catalytic Activity
Source: PubMed Central journal article supplement (PMC5094779; doi:10.1371/journal.pone.0165139), 2016-11-03

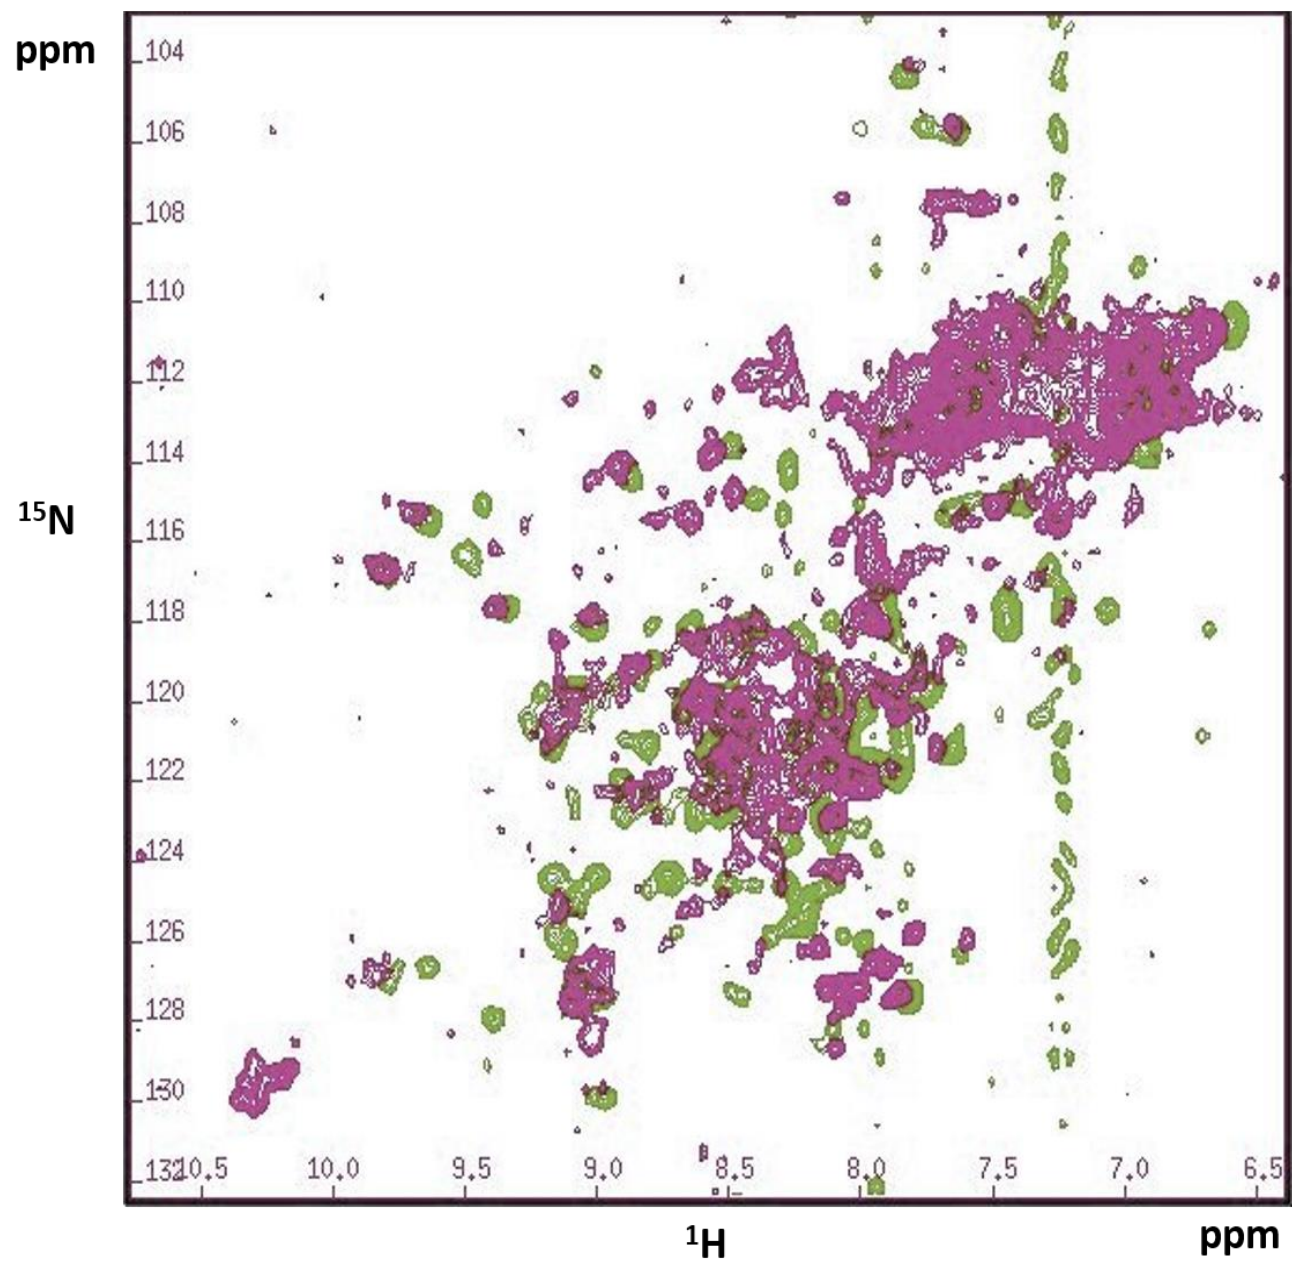

Supplement: pone.0165139.s005.pdf [file pone.0165139.s005.pdf]
