# Supplementary material for: The Human Mixed Lineage Leukemia 5 (MLL5), a Sequentially and Structurally Divergent SET Domain-Containing Protein with No Intrinsic Catalytic Activity
Source: PubMed Central journal article supplement (PMC5094779; doi:10.1371/journal.pone.0165139), 2016-11-03
Supplement: pone.0165139.s009.pdf [file pone.0165139.s009.pdf]

**Table 1**

| Species                             | Sequence name    | Accession number | Database             |
|-------------------------------------|------------------|------------------|----------------------|
| <i>Homo sapiens</i>                 | EHMT1            | ENSP00000417980  | Ensembl<br>GRCh38.p5 |
|                                     | EHMT2            | ENSP00000379078  |                      |
|                                     | EZH1             | ENSP00000466924  |                      |
|                                     | EZH2             | ENSP00000320147  |                      |
|                                     | KMT5A<br>(SETD8) | ENSP00000384629  |                      |
|                                     | NSD1             | ENSP00000395929  |                      |
|                                     | SETD2            | ENSP00000386759  |                      |
|                                     | SETD7            | ENSP00000274031  |                      |
|                                     | SETDB1           | ENSP00000271640  |                      |
|                                     | SETDB2           | ENSP00000346175  |                      |
|                                     | SETMAR           | ENSP00000373354  |                      |
|                                     | SUV39H1          | ENSP00000337976  |                      |
|                                     | SUV39H2          | ENSP00000346997  |                      |
|                                     | WHSC1            | ENSP00000329167  |                      |
|                                     | WHSC1L1          | ENSP00000313983  |                      |
|                                     | ASH1L            | ENSP00000357330  |                      |
|                                     | KMT2A (MLL)      | ENSP00000436786  |                      |
|                                     | KMT2B<br>(MLL4)  | ENSP00000398837  |                      |
|                                     | KMT2C<br>(MLL3)  | ENSP00000262189  |                      |
|                                     | KMT2D<br>(MLL2)  | ENSP00000301067  |                      |
|                                     | KMT2E (ML5)      | ENSP00000312379  |                      |
|                                     | SETD1A           | ENSP00000262519  |                      |
|                                     | SETD1B           | ENSP00000474253  |                      |
| SETD5                               | ENSP00000384114  |                  |                      |
| <i>Branchiostoma<br/>floridae</i>   | ASH1L            | 124382           | JGI v1.0<br>Braf11   |
|                                     | KMT2A/B          | 278042           |                      |
|                                     | KMT2C/D          | 125138           |                      |
|                                     | KMT2E/SETD5      | 131096           |                      |
|                                     | SETD1A/B         | 125552           |                      |
| <i>Drosophila<br/>melanogaster</i>  | ASH1             | FBpp0297151      | FlyBase<br>r6.10     |
|                                     | TRX              | FBpp0082409      |                      |
|                                     | TRR              | FBpp0070347      |                      |
|                                     | UPSET            | FBpp0075510      |                      |
|                                     | SET1             | FBpp0112592      |                      |
| <i>Saccharomyces<br/>cerevisiae</i> | SET1             | YHR119W          | SGD<br>S288C         |
|                                     | SET3             | YKR029C          |                      |
|                                     | SET4             | YJL105W          |                      |
